# Supplementary material
Source: PubMed Central journal article supplement (PMC5484761)
Supplement: NIHMS832616-supplement-Supp_Fig_S1.pdf [file NIHMS832616-supplement-Supp_Fig_S1.pdf]

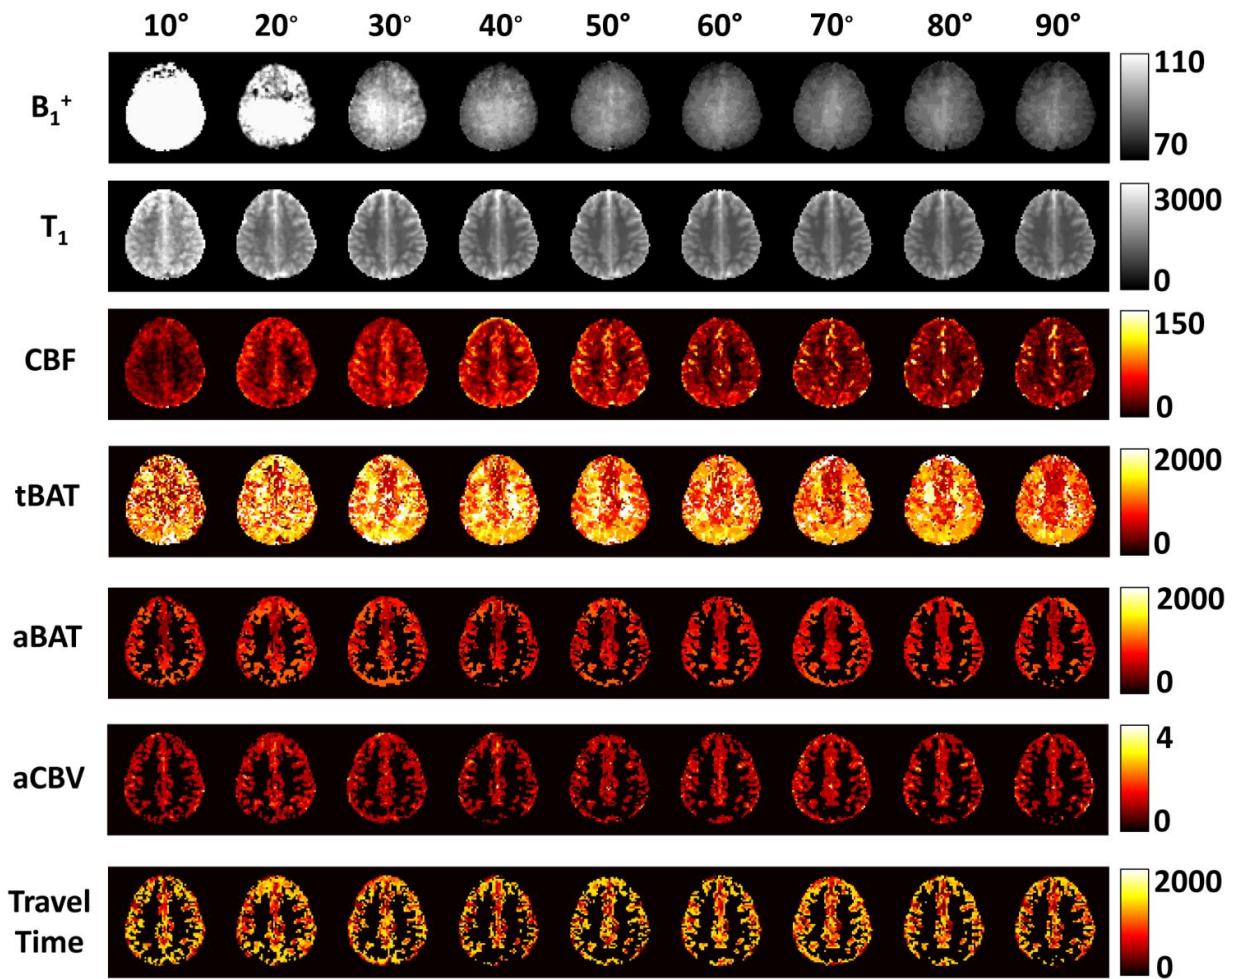

**Supporting Figure S1** - Two-compartment MRF-derived parametric maps as a function of flip angle:  $B_1^+$  (%), tissue  $T_1$  (ms), CBF (ml/100g/min), tissue BAT (ms), pass-through arterial BAT (ms), pass-through blood volume (%) and pass-through blood travel time (ms).
